# Supplementary material
Source: Springer Nature journal article supplement (https://www.springermedizin.de/resource/supplementary/13075_2012_4111_MOESM2_ESM.pdf/9696096)

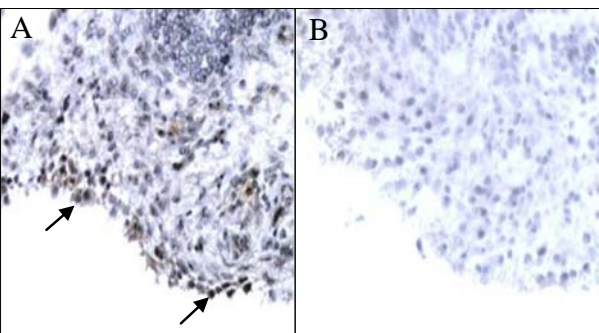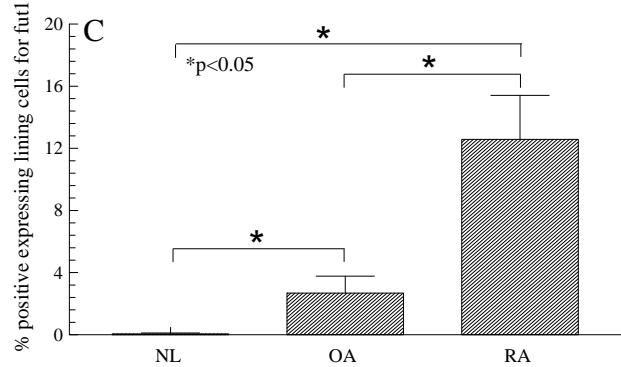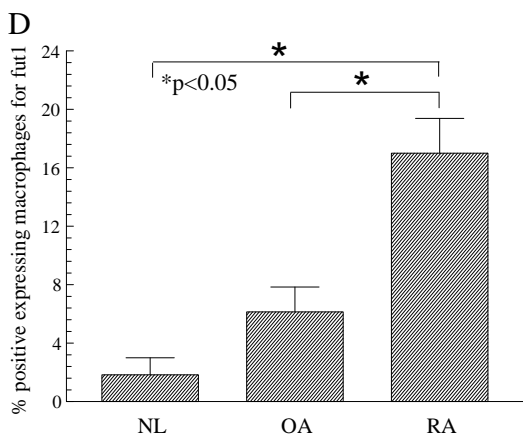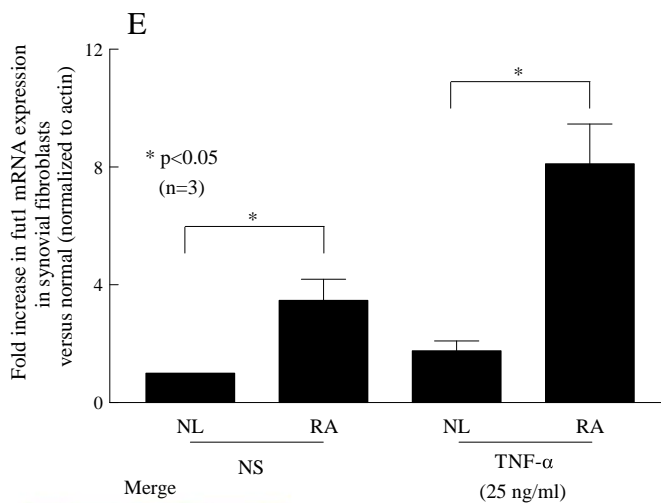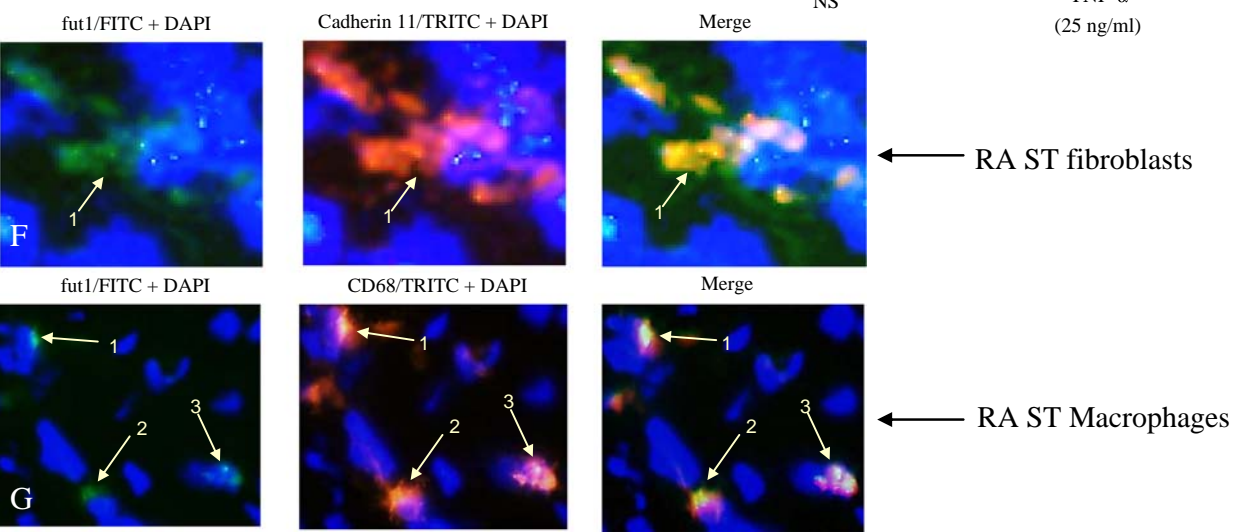

Supplement: MOESM2 [file 9696096]
